# Supplementary material for: Icaritin Promotes Myelination by Simultaneously Enhancing the Proliferation and Differentiation of Oligodendrocyte Precursor Cells
Source: MDPI journal article supplement (doi:10.3390/molecules28155837), 2023-08-03
Supplement: s1 [file s1]

# **Icaritin Promotes Myelination by Simultaneously Enhancing the Proliferation and Differentiation of Oligodendrocyte Precursor Cells**

**Feifei Yang<sup>1</sup>, Han Wen<sup>1</sup>, Siqi Ma<sup>1</sup>, Qi Chang<sup>1</sup>, Ruile Pan<sup>1</sup>, Xinmin Liu<sup>2</sup> and Yonghong Liao<sup>1,\*</sup>**

<sup>1</sup> Key Laboratory of Bioactive Substances and Resources Utilization of Chinese Herbal Medicine (Ministry of Education), Institute of Medicinal Plant Development (IMPLAD), Chinese Academy of Medical Sciences & Peking Union Medical College, No. 151 Malianwa North Road, Haidian District, Beijing 100193, China

<sup>2</sup> Institute of Drug Discovery Technology, Ningbo University, No. 818 Fenghua Road, Ningbo 315211, China

\* Correspondence: yhliao@implad.ac.cn; Tel./Fax: +86-010-57833268

## **Material and Methods (catalog no for antibodies)**

Primary antibodies: mouse monoclonal anti-Glial Fibrillary Acidic Protein (GFAP, Millipore (Burlington, MA, USA), cat. no. G6171), rabbit polyclonal anti-Microtubule Associated Protein 2 (MAP2, Millipore, cat. no. AB2290A4), Anti-Galc (Millipore, cat. no. MAB342), mouse monoclonal anti-CNPase (Millipore, cat. no. c5922), Anti-A2B5 (Millipore, cat. no. MAB312), mouse monoclonal anti-O4 (Millipore, cat. no. O7139), mouse monoclonal anti-Myelin Basic Protein (anti-MBP, Abcam (Cambridge, UK), cat. no. ab62631), PDGFR $\alpha$  (Abcam, cat. no. ab203491), Anti-Olig2 (R&D (Minneapolis, MN, USA), cat. no. AF2418) and Anti-MOG (Santa Cruz (Dallas, TX, USA), cat. no. sc-376138). Secondary antibody: Alexa Fluor 488 Goat anti-mouse IgG (Thermo Fisher Scientific, Waltham, MA, USA. cat. no. A-11001), Alexa Fluor 568 Goat anti-mouse IgM (Thermo Fisher Scientific, USA. cat. no. A-21043), Alexa Fluor 488 Goat anti-rabbit IgG (Thermo Fisher Scientific, USA, cat. no. A-11008), and Alexa Fluor 555 Goat anti-rabbit IgG (Thermo Fisher Scientific, USA. cat. no. A-21428).

### Supplementary Figures

**Figure S1** Non-toxic dose screening of herbal monomers through MTT method. PPD (A), PPT (B), 1226 (C), Geniposide (D), Curcumin (E), Catalpol (F), B4(G), Genipin (H), Emodin (I), Loganin (J), Icaritin (K), Icariin (L), Quercetin (M), Apigenin (N), Morroniside (O), Resveratrol (P), Longistyline A (Q), Cajanine (R).

**Figure S2** PDGFR $\alpha$ <sup>+</sup> positive OPCs (human). Scale bars represent 25  $\mu$ m.

**Figure S3.** Expression of hOLs markers: (A) GFAP<sup>+</sup> astrocytes and MAP2<sup>+</sup> neurons, scale bar 25  $\mu$ m; (B) O4<sup>+</sup> and Olig2<sup>+</sup> OL, scale bar 50  $\mu$ m; (C) Galc<sup>+</sup> and MOG<sup>+</sup> OL, scale bar 25  $\mu$ m; (D) CNPase<sup>+</sup> and GFAP<sup>-</sup> OL, scale bar 25  $\mu$ m; (E) MBP<sup>+</sup> and Olig2<sup>+</sup> OL, scale bar 50  $\mu$ m.

Figure S1

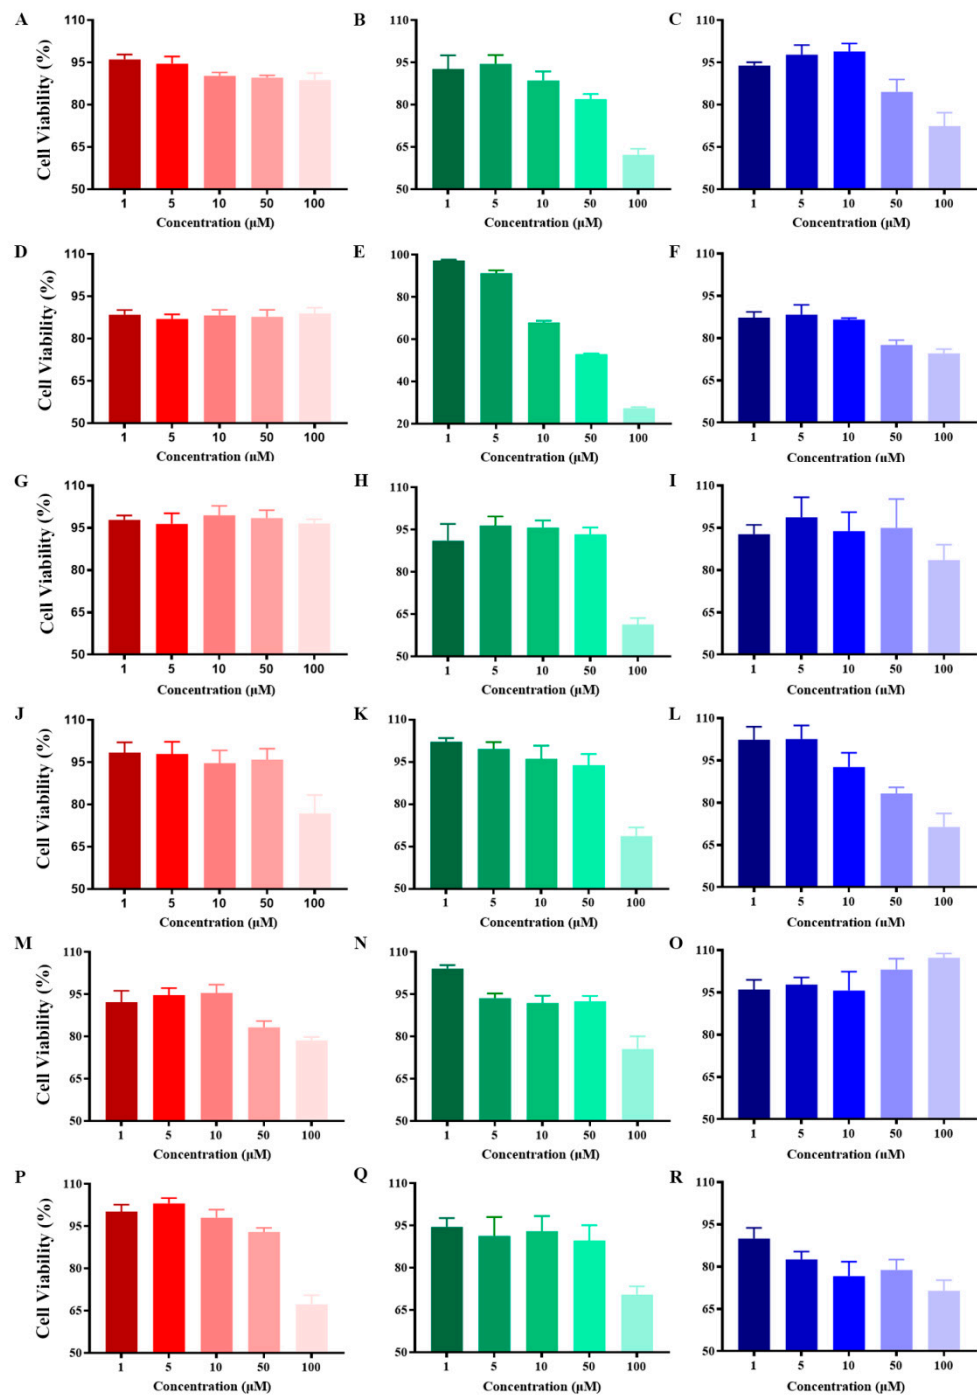

**Figure S2.**

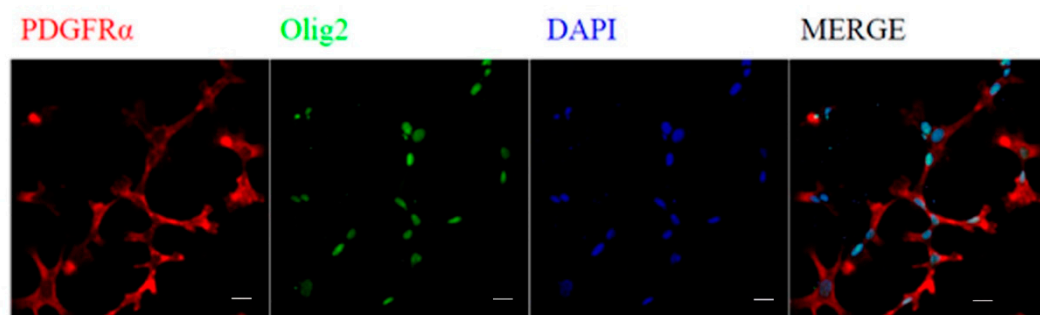

Figure S3

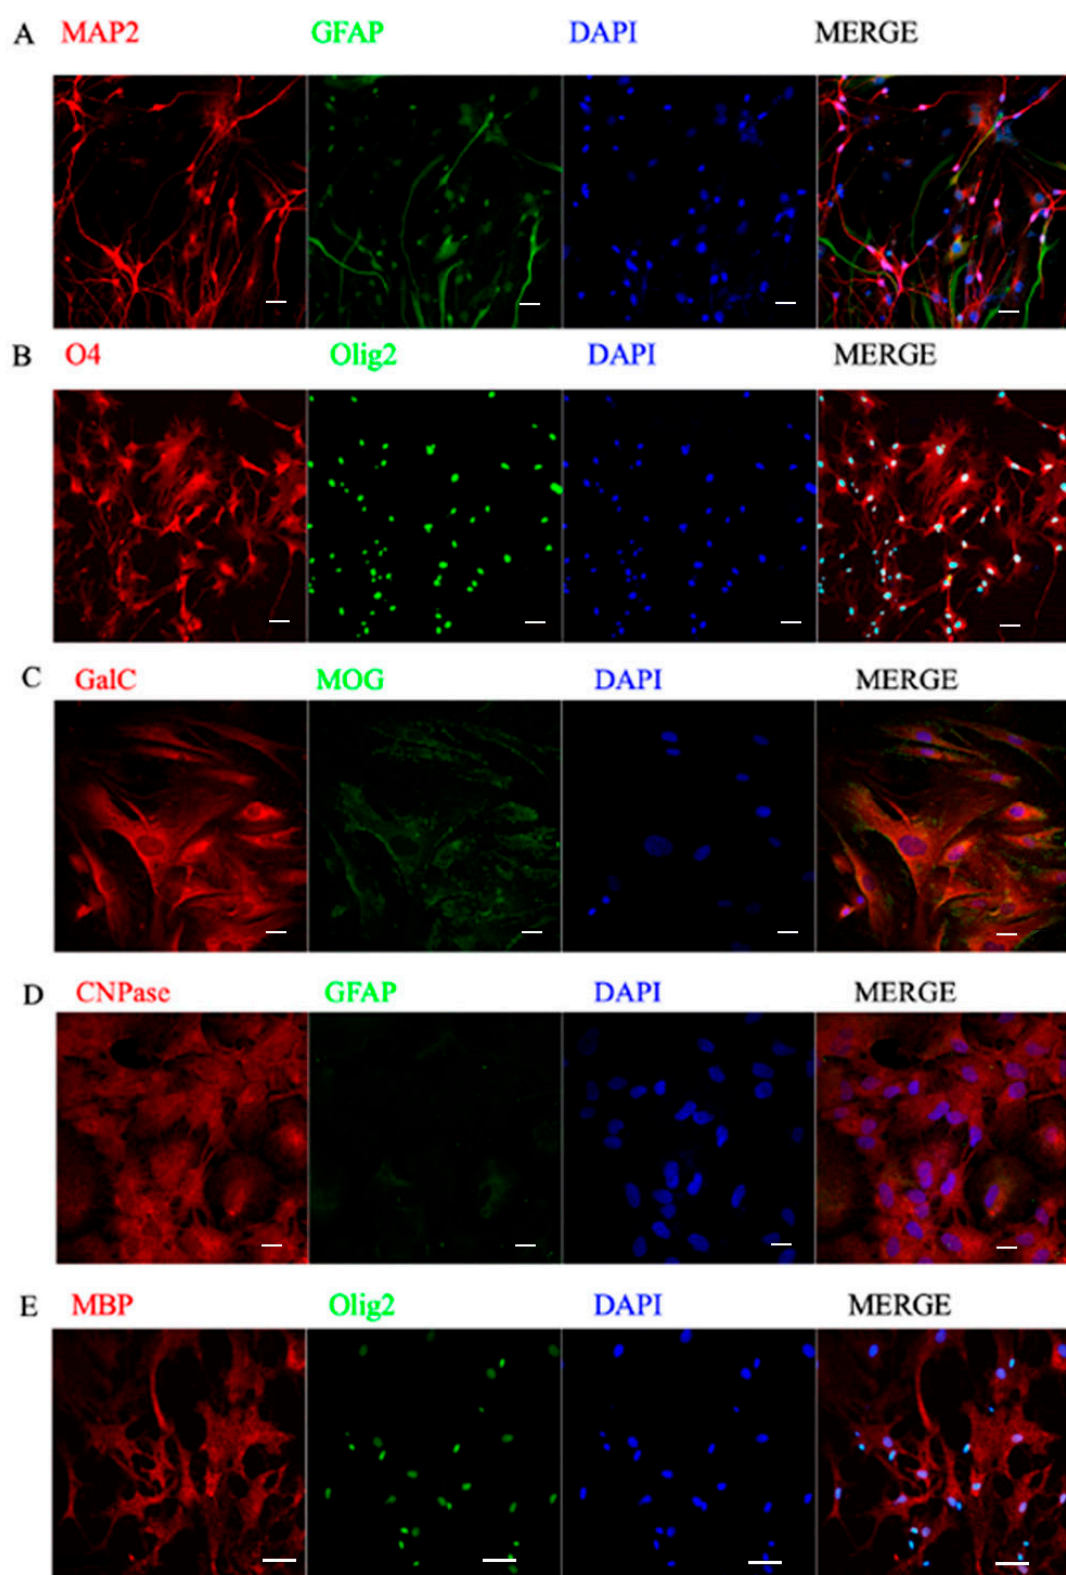

**Supplementary Tables:**

**Table S1.** Effects of TCM constituents on Glu-induced reduction viability of mNPCs. (Data are presented as mean  $\pm$  SD, n=6), Glu: glutamate.

**Table S2.** Effect of TCM constituents on CORT-induced reduction viability of mNPCs. (Data are presented as mean  $\pm$  SD, n=6), CORT: corticosterone.

**Table S1** Effects of TCM constituents on mNPCs under Glu-induced pathological condition (Data are presented as mean  $\pm$  SD, n=6)

| Group                | Concentration | Cell viability (%) |
|----------------------|---------------|--------------------|
| CTRL                 | /             | 100.23 $\pm$ 1.82  |
| Glu                  | 500 $\mu$ M   | 81.56 $\pm$ 2.23   |
| DNPZ                 | 20 $\mu$ M    | 75.82 $\pm$ 1.37   |
|                      | 100 $\mu$ M   | 48.67 $\pm$ 3.49   |
|                      | 2 $\mu$ M     | 82.59 $\pm$ 4.92   |
| PPT                  | 10 $\mu$ M    | 78.45 $\pm$ 3.27   |
|                      | 50 $\mu$ M    | 70.33 $\pm$ 3.96   |
|                      | 2 $\mu$ M     | 80.98 $\pm$ 4.25   |
| PPD                  | 10 $\mu$ M    | 75.32 $\pm$ 3.97   |
|                      | 50 $\mu$ M    | 61.23 $\pm$ 3.44   |
|                      | 2 $\mu$ g/mL  | 72.49 $\pm$ 3.75   |
| 1226                 | 10 $\mu$ g/mL | 68.43 $\pm$ 2.66   |
|                      | 50 $\mu$ g/mL | 55.43 $\pm$ 4.94   |
|                      | 2 $\mu$ M     | 82.25 $\pm$ 3.76   |
| Catalpol (CAT)       | 10 $\mu$ M    | 83.51 $\pm$ 4.75   |
|                      | 50 $\mu$ M    | 88.66 $\pm$ 1.53   |
|                      | 2 $\mu$ M     | 82.73 $\pm$ 3.24   |
| Geniposide           | 10 $\mu$ M    | 81.52 $\pm$ 2.24   |
|                      | 50 $\mu$ M    | 75.43 $\pm$ 4.97   |
|                      | 2 $\mu$ M     | 77.33 $\pm$ 5.96   |
| Emodin               | 10 $\mu$ M    | 65.72 $\pm$ 4.28   |
|                      | 50 $\mu$ M    | 40.42 $\pm$ 2.15   |
|                      | 2 $\mu$ M     | 77.25 $\pm$ 4.36   |
| Cajanine             | 10 $\mu$ M    | 49.51 $\pm$ 3.27   |
|                      | 50 $\mu$ M    | 36.95 $\pm$ 1.48   |
|                      | 2 $\mu$ M     | 91.32 $\pm$ 1.76   |
| Longistyline A (LoA) | 10 $\mu$ M    | 79.34 $\pm$ 5.28   |
|                      | 50 $\mu$ M    | 52.38 $\pm$ 2.40   |
|                      | 2 $\mu$ g/mL  | 89.77 $\pm$ 2.37   |
| B4                   | 10 $\mu$ g/mL | 94.35 $\pm$ 1.92   |
|                      | 50 $\mu$ g/mL | 76.92 $\pm$ 2.51   |

|                |            |                   |
|----------------|------------|-------------------|
| Curcumin (CUR) | 2 $\mu$ M  | 92.84 $\pm$ 1.86  |
|                | 10 $\mu$ M | 98.72 $\pm$ 1.40  |
|                | 50 $\mu$ M | 64.59 $\pm$ 3.82  |
| Resveratrol    | 2 $\mu$ M  | 80.32 $\pm$ 4.58  |
|                | 10 $\mu$ M | 79.40 $\pm$ 2.14  |
|                | 50 $\mu$ M | 72.83 $\pm$ 4.59  |
| Genipin (GEN)  | 2 $\mu$ M  | 83.10 $\pm$ 2.59  |
|                | 10 $\mu$ M | 90.26 $\pm$ 0.84  |
|                | 50 $\mu$ M | 75.25 $\pm$ 3.83  |
| Icaritin (ICT) | 2 $\mu$ M  | 84.59 $\pm$ 2.40  |
|                | 10 $\mu$ M | 115.56 $\pm$ 1.79 |
|                | 50 $\mu$ M | 123.02 $\pm$ 1.64 |
| Icariin        | 2 $\mu$ M  | 72.39 $\pm$ 4.30  |
|                | 10 $\mu$ M | 74.66 $\pm$ 2.29  |
|                | 50 $\mu$ M | 63.14 $\pm$ 3.71  |
| Quercetin      | 2 $\mu$ M  | 82.42 $\pm$ 3.72  |
|                | 10 $\mu$ M | 72.03 $\pm$ 0.71  |
|                | 50 $\mu$ M | 55.23 $\pm$ 3.93  |
| Apigenin       | 2 $\mu$ M  | 84.38 $\pm$ 3.56  |
|                | 10 $\mu$ M | 66.95 $\pm$ 3.25  |
|                | 50 $\mu$ M | 66.38 $\pm$ 4.58  |
| Loganin        | 2 $\mu$ M  | 82.92 $\pm$ 2.96  |
|                | 10 $\mu$ M | 80.50 $\pm$ 3.83  |
|                | 50 $\mu$ M | 79.31 $\pm$ 2.12  |
| Morroniside    | 2 $\mu$ M  | 85.49 $\pm$ 2.25  |
|                | 10 $\mu$ M | 79.56 $\pm$ 3.01  |
|                | 50 $\mu$ M | 79.31 $\pm$ 2.29  |

---



**Table S2** Effects of TCM on mNPCs constituents under CORT-induced pathological condition(Data are presented as mean  $\pm$  SD, n=6)

| Group          | Concentration | Cell viability (%) |
|----------------|---------------|--------------------|
| CTRL           | /             | 98.29 $\pm$ 2.52   |
| CORT           | 100 $\mu$ M   | 67.01 $\pm$ 1.86   |
| DNPZ           | 20 $\mu$ M    | 65.82 $\pm$ 1.73   |
|                | 100 $\mu$ M   | 63.59 $\pm$ 2.78   |
|                | 2 $\mu$ M     | 68.77 $\pm$ 3.21   |
| PPT            | 10 $\mu$ M    | 70.24 $\pm$ 3.25   |
|                | 50 $\mu$ M    | 55.78 $\pm$ 3.52   |
|                | 2 $\mu$ M     | 59.32 $\pm$ 4.51   |
| PPD            | 10 $\mu$ M    | 64.59 $\pm$ 2.18   |
|                | 50 $\mu$ M    | 53.47 $\pm$ 3.86   |
|                | 2 $\mu$ g/mL  | 68.34 $\pm$ 2.71   |
| 1226           | 10 $\mu$ g/mL | 57.59 $\pm$ 3.50   |
|                | 50 $\mu$ g/mL | 53.24 $\pm$ 4.67   |
|                | 2 $\mu$ M     | 69.16 $\pm$ 3.82   |
| Catalpol (CAT) | 10 $\mu$ M    | 71.23 $\pm$ 2.56   |
|                | 50 $\mu$ M    | 76.90 $\pm$ 1.54   |
|                | 2 $\mu$ M     | 70.12 $\pm$ 3.25   |
| Geniposide     | 10 $\mu$ M    | 64.87 $\pm$ 2.14   |
|                | 50 $\mu$ M    | 60.74 $\pm$ 3.89   |
|                | 2 $\mu$ M     | 63.27 $\pm$ 1.82   |
| Emodin         | 10 $\mu$ M    | 61.90 $\pm$ 2.78   |
|                | 50 $\mu$ M    | 52.34 $\pm$ 3.25   |
|                | 2 $\mu$ M     | 62.18 $\pm$ 3.42   |
| Cajanine       | 10 $\mu$ M    | 59.63 $\pm$ 1.39   |
|                | 50 $\mu$ M    | 38.72 $\pm$ 2.91   |
|                | 2 $\mu$ M     | 63.58 $\pm$ 3.46   |
| Longistyline A | 10 $\mu$ M    | 59.10 $\pm$ 2.17   |
|                | 50 $\mu$ M    | 36.54 $\pm$ 1.35   |
|                | 2 $\mu$ g/mL  | 69.36 $\pm$ 2.47   |
| B4             | 10 $\mu$ g/mL | 68.12 $\pm$ 1.79   |
|                | 50 $\mu$ g/mL | 68.45 $\pm$ 2.36   |

| Group          | Concentration | Cell viability (%) |
|----------------|---------------|--------------------|
| Curcumin (CUR) | 2 $\mu$ M     | 73.67 $\pm$ 1.71   |
|                | 10 $\mu$ M    | 75.82 $\pm$ 1.55   |
|                | 50 $\mu$ M    | 42.35 $\pm$ 3.68   |
| Resveratrol    | 2 $\mu$ M     | 66.38 $\pm$ 2.37   |
|                | 10 $\mu$ M    | 59.48 $\pm$ 3.32   |
|                | 50 $\mu$ M    | 52.31 $\pm$ 2.90   |
| Genipin (GEN)  | 2 $\mu$ M     | 71.2 $\pm$ 3.84    |
|                | 10 $\mu$ M    | 75.21 $\pm$ 1.74   |
|                | 50 $\mu$ M    | 78.32 $\pm$ 1.99   |
| Icaritin (ICT) | 2 $\mu$ M     | 70.45 $\pm$ 1.95   |
|                | 10 $\mu$ M    | 92.43 $\pm$ 3.62   |
|                | 50 $\mu$ M    | 100.30 $\pm$ 2.15  |
| Icariin (ICA)  | 2 $\mu$ M     | 71.04 $\pm$ 3.91   |
|                | 10 $\mu$ M    | 69.85 $\pm$ 2.76   |
|                | 50 $\mu$ M    | 62.31 $\pm$ 2.32   |
| Quercetin      | 2 $\mu$ M     | 71.03 $\pm$ 3.63   |
|                | 10 $\mu$ M    | 42.99 $\pm$ 2.64   |
|                | 50 $\mu$ M    | 38.78 $\pm$ 3.20   |
| Apigenin       | 2 $\mu$ M     | 72.24 $\pm$ 3.10   |
|                | 10 $\mu$ M    | 69.72 $\pm$ 3.09   |
|                | 50 $\mu$ M    | 44.98 $\pm$ 2.20   |
| Loganin        | 2 $\mu$ M     | 71.41 $\pm$ 2.53   |
|                | 10 $\mu$ M    | 72.03 $\pm$ 2.11   |
|                | 50 $\mu$ M    | 71.85 $\pm$ 2.11   |
| Morroniside    | 2 $\mu$ M     | 70.37 $\pm$ 2.25   |
|                | 10 $\mu$ M    | 72.07 $\pm$ 2.70   |
|                | 50 $\mu$ M    | 71.51 $\pm$ 3.81   |
